# Supplementary material for: Assembly of hundreds of novel bacterial genomes from the chicken caecum
Source: PubMed Central journal article supplement (PMC7014784; doi:10.1186/s13059-020-1947-1), 2020-02-12
Supplement: 13059_2020_1947_MOESM1_ESM.pdf [file 13059_2020_1947_MOESM1_ESM.pdf]

**Fig S1:**

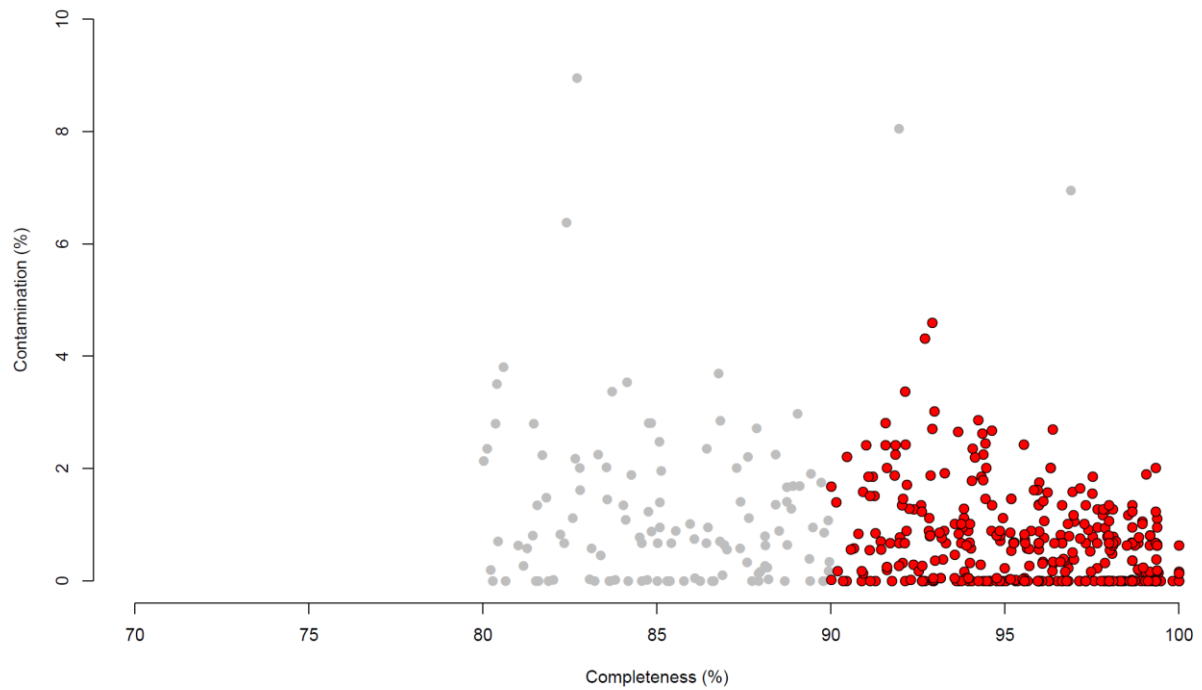

**Contamination and completeness of 469 dereplicated draft microbial genomes from the chicken caeca. Contamination and completeness were defined by the CheckM software. Red circles indicate genomes which are >90% complete with <5% contamination. Grey circles indicate genomes which are 80-90% complete with 5-10% contamination.**

**Fig. S2:**

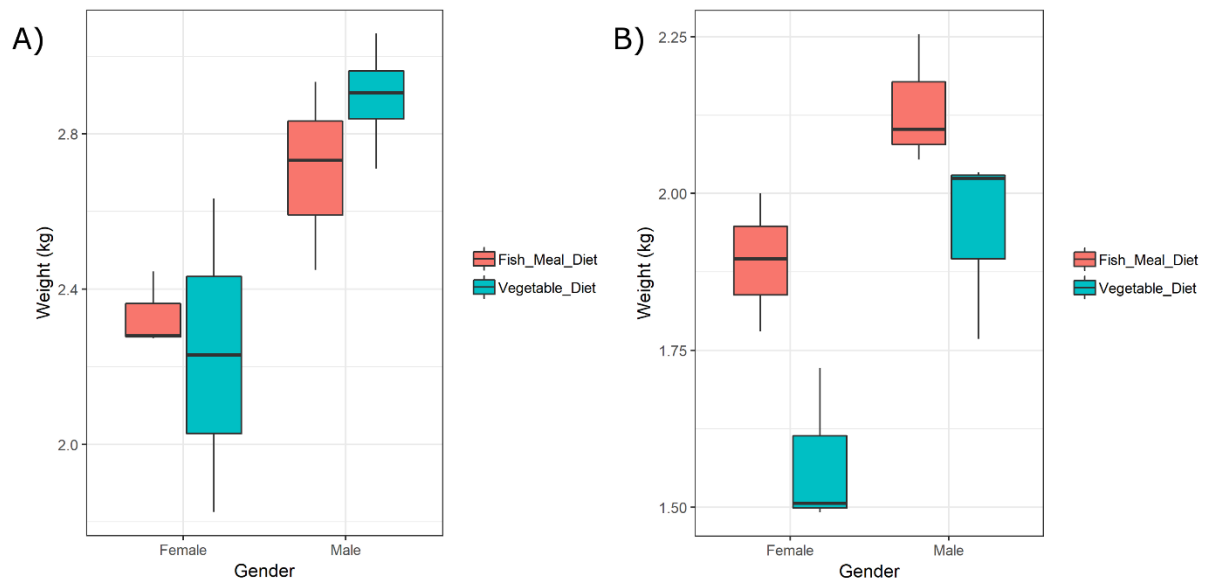

**Boxplots showing the weight of birds from either the Ross 308 (n=12) or Ranger Classic (n=12) line, fed either a vegetable diet or a diet which included fish meal.**

**Table S1: Chicken details**

| <b>ID</b>  | <b>Tag</b> | <b>Line</b>    | <b>Diet</b> | <b>Gender</b> | <b>Body weight (kg)</b> |
|------------|------------|----------------|-------------|---------------|-------------------------|
| Chicken_1  | 1472       | Ranger Classic | Fish        | Female        | 1.90                    |
| Chicken_2  | 1677       | Ross 308       | Fish        | Male          | 2.73                    |
| Chicken_3  | 1535       | Ranger Classic | Vegetable   | Male          | 2.03                    |
| Chicken_4  | 1591       | Ross 308       | Vegetable   | Male          | 2.71                    |
| Chicken_5  | 1445       | Ranger Classic | Fish        | Female        | 2.00                    |
| Chicken_6  | 1724       | Ross 308       | Fish        | Female        | 2.28                    |
| Chicken_7  | 1545       | Ranger Classic | Vegetable   | Male          | 2.02                    |
| Chicken_8  | 1774       | Ross 308       | Vegetable   | Male          | 2.93                    |
| Chicken_9  | 1531       | Ranger Classic | Fish        | Male          | 2.05                    |
| Chicken_10 | 1738       | Ross 308       | Fish        | Female        | 2.27                    |
| Chicken_11 | 1498       | Ranger Classic | Vegetable   | Female        | 1.49                    |
| Chicken_12 | 1687       | Ross 308       | Vegetable   | Female        | 1.83                    |
| Chicken_13 | 1423       | Ranger Classic | Fish        | Female        | 1.78                    |
| Chicken_14 | 1675       | Ross 308       | Fish        | Male          | 2.45                    |
| Chicken_15 | 1494       | Ranger Classic | Vegetable   | Female        | 1.72                    |
| Chicken_16 | 1707       | Ross 308       | Vegetable   | Male          | 2.88                    |
| Chicken_17 | 1473       | Ranger Classic | Fish        | Male          | 2.10                    |
| Chicken_18 | 1764       | Ross 308       | Fish        | Male          | 2.93                    |
| Chicken_19 | 1418       | Ranger Classic | Vegetable   | Male          | 1.768                   |
| Chicken_20 | 1730       | Ross 308       | Vegetable   | Male          | 3.058                   |
| Chicken_21 | 1421       | Ranger Classic | Fish        | Male          | 2.254                   |
| Chicken_22 | 1640       | Ross 308       | Fish        | Female        | 2.446                   |
| Chicken_23 | 1507       | Ranger Classic | Vegetable   | Female        | 1.506                   |

|            |      |          |           |        |       |
|------------|------|----------|-----------|--------|-------|
| Chicken_24 | 1568 | Ross 308 | Vegetable | Female | 2.634 |
|------------|------|----------|-----------|--------|-------|

**Table S2: Formulation of fish meal and vegetable starter diets (Target Feeds Ltd, UK)**

| <b>Raw materials</b>               | <b>Broiler starter fish (%)</b> | <b>Broiler starter standard (vegetable) (%)</b> |
|------------------------------------|---------------------------------|-------------------------------------------------|
| 1 Barley raw ground                | 12.7                            | 10.5                                            |
| 10 Wheat raw ground                | 58.4                            | 50.0                                            |
| 423 Soya ext hipro                 | 10.5                            | 26                                              |
| 426 Full fat soya masham           | 5                               | 5                                               |
| 459 Provimi white fishmeal         | 10                              | 0                                               |
| 712 L-lysine Hcl                   | 0.35                            | 0.4                                             |
| 713 DL methionine                  | 0.33                            | 0.4                                             |
| 714 L-threonine                    | 0.15                            | 0.15                                            |
| 716 L-Tryptophan                   | 0.02                            | 0.00                                            |
| 810 Soya oil                       | 1.6                             | 4                                               |
| 896 Limestone flour tru. 270       | 0.25                            | 1.25                                            |
| 901 Monocalcium phosphate          | 0.1                             | 1.5                                             |
| 904 Salt                           | 0.05                            | 0.25                                            |
| 906 Sodium bicarbonate             | 0.15                            | 0.15                                            |
| 3482 Br. Trials PMX. Starter<br>4K | 0.4                             | 0.4                                             |

**Table S3: Formulation of fish meal and vegetable grower diets (Target Feeds Ltd, UK)**

| <b>Raw materials</b>            | <b>Broiler grower fish (%)</b> | <b>Broiler grower standard (vegetable) (%)</b> |
|---------------------------------|--------------------------------|------------------------------------------------|
| 1 Barley raw ground             | 8.4                            | 8.4                                            |
| 10 Wheat raw ground             | 60.34                          | 55.0                                           |
| 423 Soya ext hipro              | 15.0                           | 23.0                                           |
| 425 Full fat soya Cherwell      | 5.0                            | 5.0                                            |
| 459 Provimi white fishmeal      | 5.0                            | 0.0                                            |
| 712 L-lysine Hcl                | 0.3                            | 0.3                                            |
| 713 DL methionine               | 0.31                           | 0.35                                           |
| 714 L-threonine                 | 0.15                           | 0.15                                           |
| 810 Soya oil                    | 3.25                           | 4.5                                            |
| 900 Limestone Trucal 52         | 0.75                           | 1.25                                           |
| 901 Monocalcium phosphate       | 0.7                            | 1.25                                           |
| 904 Salt                        | 0.25                           | 0.25                                           |
| 906 Sodium bicarbonate          | 0.15                           | 0.15                                           |
| 3483 Br. Trials PMX. Gro/Fin 4K | 0.4                            | 0.4                                            |

**Table S4: Nutritional info of fish meal and vegetable diets (Target Feeds Ltd, UK)**

| <b>Nutrient</b> | <b>Broiler starter fish</b> | <b>Broiler starter standard (vegetable)</b> | <b>Broiler grower fish</b> | <b>Broiler grower standard (vegetable)</b> |
|-----------------|-----------------------------|---------------------------------------------|----------------------------|--------------------------------------------|
| Oil EE          | 4.5246                      | 6.3685                                      | 5.8789                     | 6.8528                                     |
| Protein         | 21.7423                     | 21.4436                                     | 20.2641                    | 20.1993                                    |
| Fibre           | 2.9826                      | 3.1325                                      | 2.9279                     | 3.0280                                     |
| Ash             | 4.7791                      | 6.0665                                      | 5.2399                     | 5.6815                                     |
| Me-P            | 12.7907                     | 12.7703                                     | 13.0385                    | 13.0441                                    |
| Tlysine         | 1.4372                      | 1.4343                                      | 1.2819                     | 1.2682                                     |
| Avlysine        | 1.3230                      | 1.3356                                      | 1.1894                     | 1.1829                                     |
| Meth            | 0.6928                      | 0.6900                                      | 0.6209                     | 0.6260                                     |
| M+C             | 0.9902                      | 1.0155                                      | 0.9164                     | 0.9373                                     |
| Threo           | 0.9132                      | 0.9013                                      | 0.8504                     | 0.8497                                     |
| Trypt           | 0.2509                      | 0.2523                                      | 0.2235                     | 0.2359                                     |
| Calcium         | 0.9549                      | 0.9805                                      | 0.9417                     | 0.9304                                     |
| Phos            | 0.6831                      | 0.7289                                      | 0.6658                     | 0.6575                                     |
| Av phos         | 0.4908                      | 0.4818                                      | 0.4598                     | 0.4227                                     |
| Salt            | 0.2991                      | 0.3092                                      | 0.4024                     | 0.3077                                     |
| Sodium          | 0.1677                      | 0.1749                                      | 0.2128                     | 0.1763                                     |
| Vitamin A       | 13.5000                     | 13.5000                                     | 10.0000                    | 10.0000                                    |
| Vitamin D3      | 5.0000                      | 5.0000                                      | 5.0000                     | 5.0000                                     |
| Vitamin E       | 100.0000                    | 100.0000                                    | 100.0000                   | 100.0000                                   |

**Table S5: DNA extractions**

| <b>ID</b>  | <b>Sampling_date</b> | <b>DNA_extraction_date</b> | <b>DNA_extraction_batch</b> |
|------------|----------------------|----------------------------|-----------------------------|
| Chicken_4  | 27th June 2018       | 28th June 2018             | 1                           |
| Chicken_8  | 27th June 2018       | 6th July 2018              | 2                           |
| Chicken_12 | 27th June 2018       | 6th July 2018              | 2                           |
| Chicken_16 | 27th June 2018       | 28th June 2018             | 3                           |
| Chicken_20 | 27th June 2018       | 28th June 2018             | 3                           |
| Chicken_24 | 27th June 2018       | 28th June 2018             | 1                           |
| Chicken_2  | 27th June 2018       | 6th July 2018              | 2                           |
| Chicken_6  | 27th June 2018       | 28th June 2018             | 3                           |
| Chicken_10 | 27th June 2018       | 6th July 2018              | 2                           |
| Chicken_14 | 27th June 2018       | 6th July 2018              | 2                           |
| Chicken_18 | 27th June 2018       | 28th June 2018             | 3                           |
| Chicken_22 | 27th June 2018       | 6th July 2018              | 2                           |
| Chicken_3  | 27th June 2018       | 6th July 2018              | 2                           |
| Chicken_7  | 27th June 2018       | 28th June 2018             | 1                           |
| Chicken_11 | 27th June 2018       | 28th June 2018             | 1                           |
| Chicken_15 | 27th June 2018       | 28th June 2018             | 3                           |
| Chicken_19 | 27th June 2018       | 28th June 2018             | 3                           |
| Chicken_23 | 27th June 2018       | 28th June 2018             | 1                           |
| Chicken_1  | 27th June 2018       | 28th June 2018             | 1                           |
| Chicken_5  | 27th June 2018       | 28th June 2018             | 3                           |
| Chicken_9  | 27th June 2018       | 28th June 2018             | 1                           |
| Chicken_13 | 27th June 2018       | 6th July 2018              | 2                           |
| Chicken_17 | 27th June 2018       | 28th June 2018             | 1                           |



|            |                |                |   |
|------------|----------------|----------------|---|
| Chicken_21 | 27th June 2018 | 28th June 2018 | 3 |
|------------|----------------|----------------|---|
